# Supplementary material for: Dye-sensitized nanostructured crystalline mesoporous tin-doped indium oxide films with tunable thickness for photoelectrochemical applications
Source: Royal Society of Chemistry journal article supplement (doi:10.1039/c3ta10728k), 2013-01-01
Supplement: c3ta10728k.pdf [file c3ta10728k.pdf]

## Supporting Information

# Dye Sensitized Nanostructured Crystalline Mesoporous Tin-doped Indium Oxide Films with Tunable Thickness for Photoelectrochemical Applications

W. Hamd,<sup>1</sup> M. Chavarot-Kerlidou,<sup>\*2</sup> J. Fize,<sup>2</sup> G. Muller,<sup>1</sup> A. Leyris,<sup>3</sup> M. Matheron,<sup>3</sup> E. Courtin<sup>1</sup>, M. Fontecave,<sup>2,4</sup> C. Sanchez,<sup>1,4</sup> V. Artero,<sup>2</sup> and C. Laberty-Robert<sup>\*1</sup>

1. *Laboratoire de Chimie de la Matière Condensée de Paris-UMR7574, CNRS, Université Paris 6, Collège de France, 11 place Marcelin Berthelot 75005 Paris*

2. *Laboratoire de Chimie et Biologie des Métaux, Université Grenoble 1, CNRS, CEA, 17 rue des Martyrs 38054 Grenoble cedex 9*

3. *Department of Technology for Biology and Health, CEA LETI-MINATEC, 17 rue des Martyrs, F-38054 Grenoble CEDEX 9, France*

4. *Collège de France, 11 Place Marcelin Berthelot, 75005 Paris*

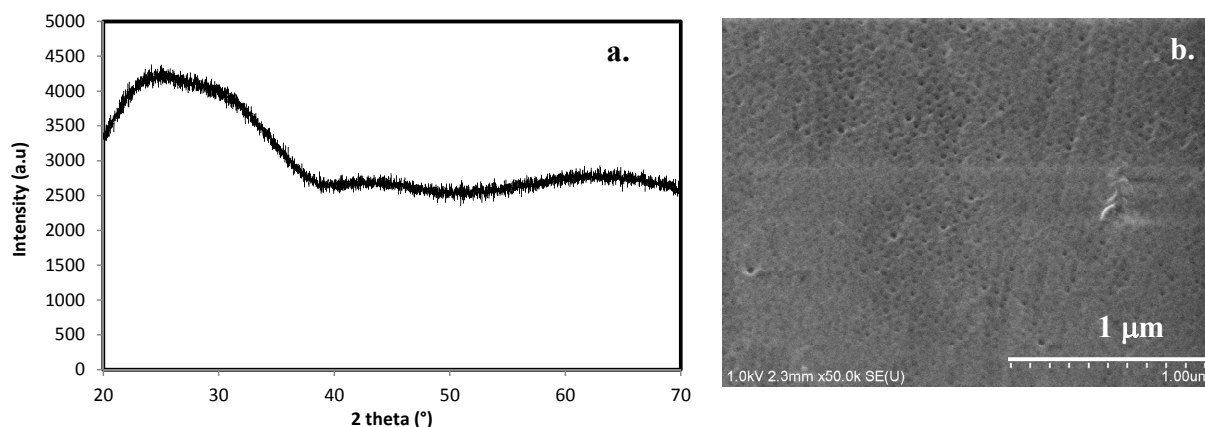

**Figure S1.** X-Ray diffraction patterns (a) and FE-SEM images (b) of *templated nano-ITO* films before thermal treatment.

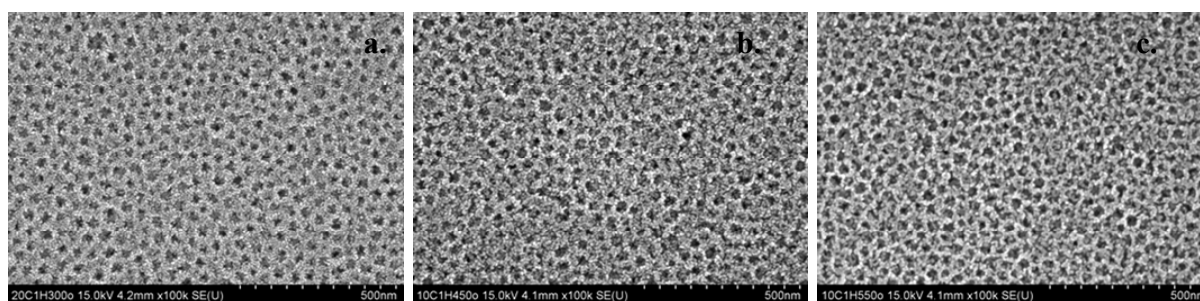

**Figure S2.** FE-SEM images of *templated nano-ITO* films treated at various temperatures a) 300°C, b) 450°C, c) 550°C in air

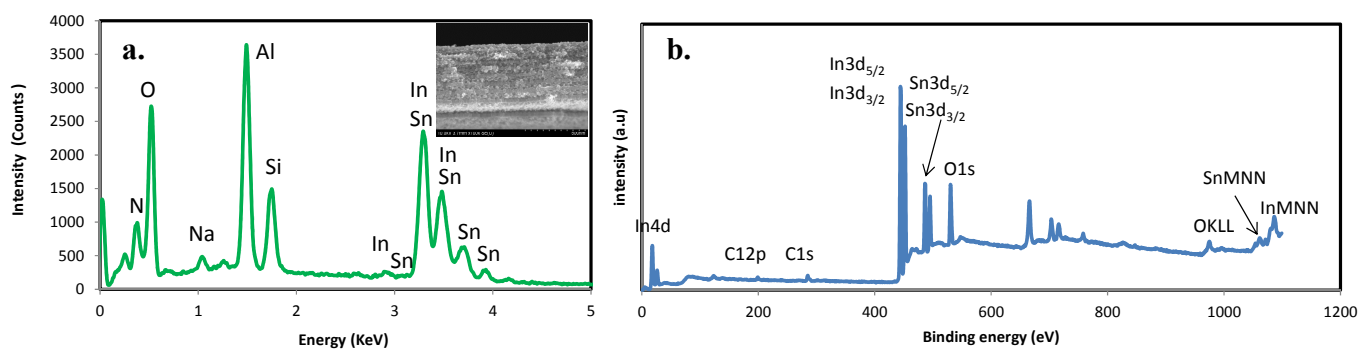

**Figure S3.** EDX (a) and XPS (b) analyses for *templated nano-ITO* films heat-treated at 450°C in air

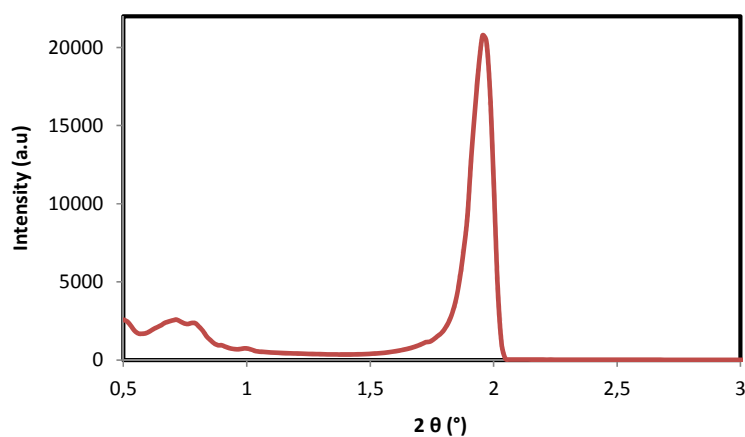

**Figure S4.** Small-angle X-ray diffraction of *templated nano*-ITO films calcined at 450°C. The most intense peak can be attributed to the (220) of mesopores organized into a cubic structure. The peaks before are due to interference.

**Table 1. Crystallites size as function of the heat-treatment.** Evolution of the crystallites size as function of the heat-treatment, determined from Debye and Scherrer formula (noted D(222)sherrer in the table), Dmean corresponds to mean diameter obtained by this method, and from Williamson et al. approach (noted D Williamson et hall in Table 1).

| Temperature | D (222)-Scherrer | D mean  | D williamson et Hall |
|-------------|------------------|---------|----------------------|
| 300 °C      | 15 nm            | 15,6 nm | 16,6 nm              |
| 450 °C      | 21 nm            | 20,4 nm | 25 nm                |
| 550 °C      | 23 nm            | 21,5 nm | 30 nm                |

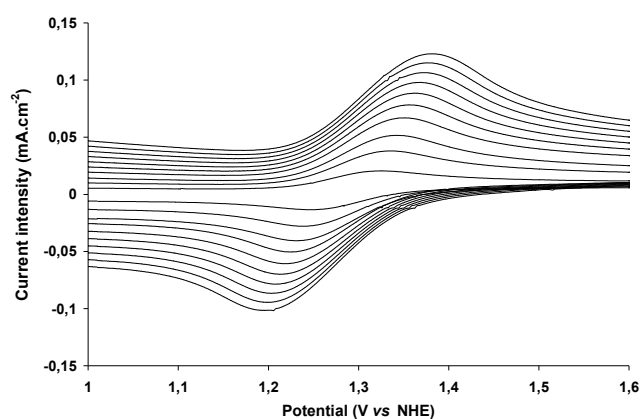

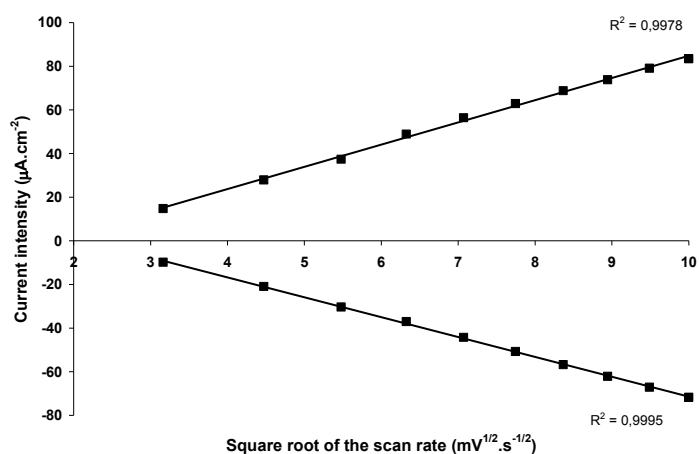

**Figure S5.** *Top* Cyclic voltammograms of [Ru(bpy)<sub>3</sub>]Cl<sub>2</sub>, 1 mM in 0.1M aqueous HOTf at scan rates varying from 10 to 100 mV.s<sup>-1</sup>, recorded at a non-functionalized nanostructured ITO electrode (10 layers, treated at 450°C for 1 hour in air; electrode surface: 1 cm<sup>2</sup>). *Bottom* Linear evolution with the square root of the scan rate of the cathodic and anodic peak currents (capacitive current subtracted) related to the Ru<sup>III</sup>/Ru<sup>II</sup> couple.

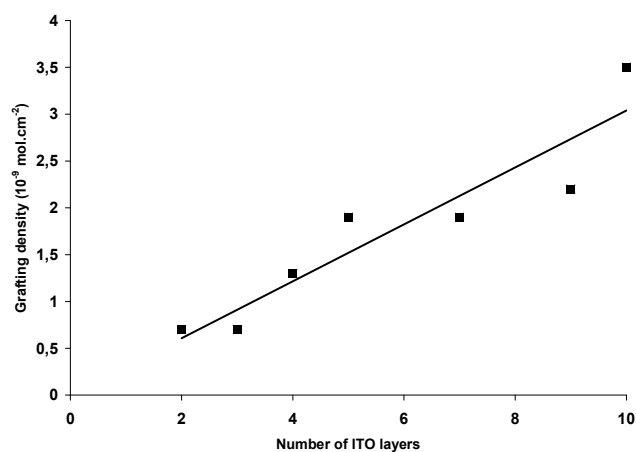

**Figure S6.** Dependence of the grafting density on the number of layers for multi-layered nanostructured ITO films.

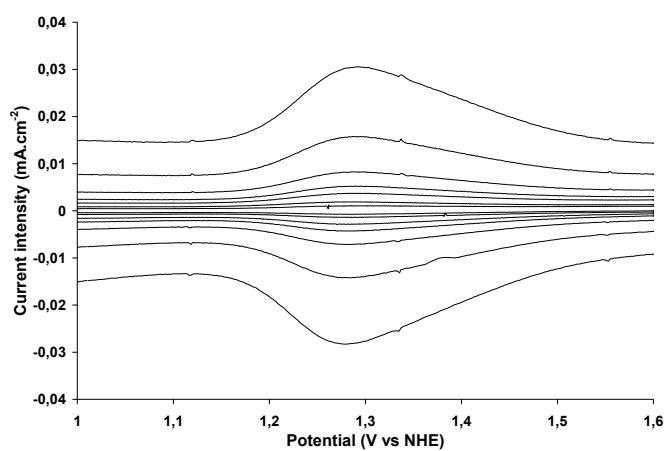

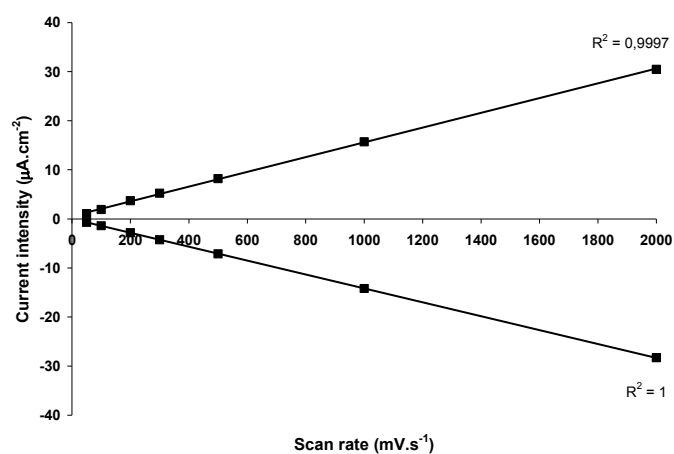

**Figure S7.** *Top* Cyclic voltammograms of complex **1** adsorbed on planar ITO (electrode surface:  $1\text{ cm}^2$ ), recorded in  $0.1\text{M}$  aqueous HOTf at scan rates varying from  $50$  to  $2000\text{ mV}\cdot\text{s}^{-1}$ . *Bottom* Linear evolution with the scan rate of the cathodic and anodic peak currents related to the  $\text{Ru}^{\text{III}}/\text{Ru}^{\text{II}}$  couple.

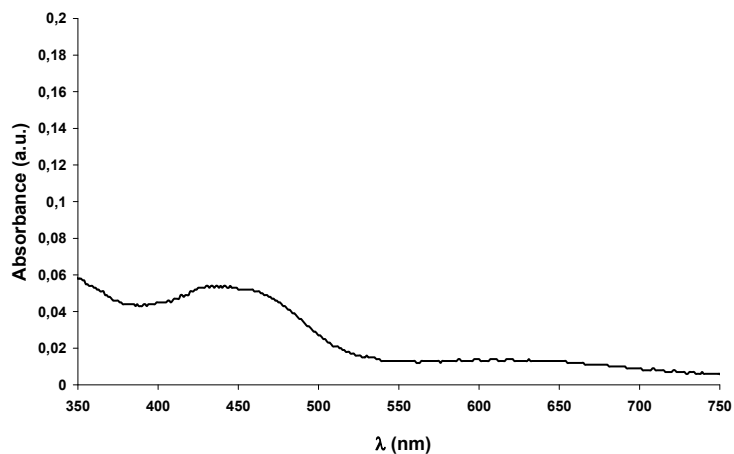

**Figure S8.** Absorption spectrum of complex **1** adsorbed on *templated nano-ITO* (10 layers, treated at  $450^\circ\text{C}$  for 1 hour in air), after subtraction of the absorption of the non-functionalized *templated nano-ITO* film.

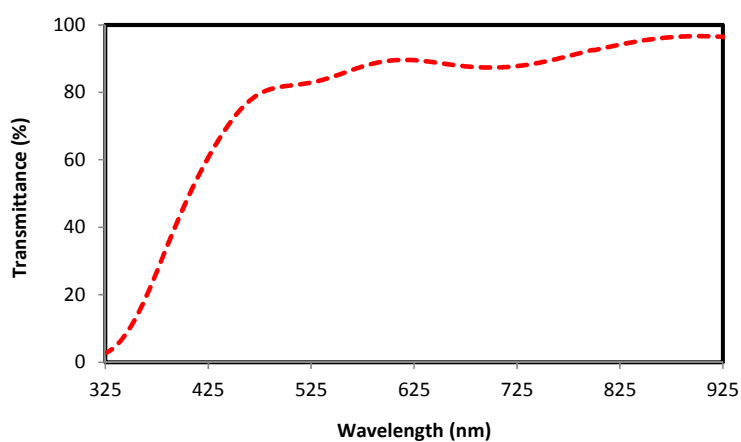

**Figure S9.** Transmittance for the 10-layers *dense nano-ITO* film heat-treated at  $450^\circ\text{C}$  for 1 h in air

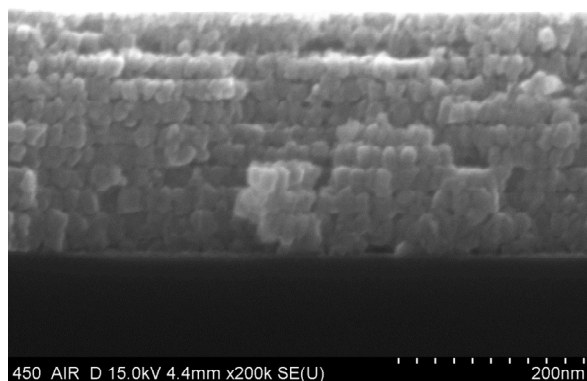

Figure S10. FE-SEM image (cross section view) of a 10 layers *dense nano-ITO* film treated at 450°C, in air.

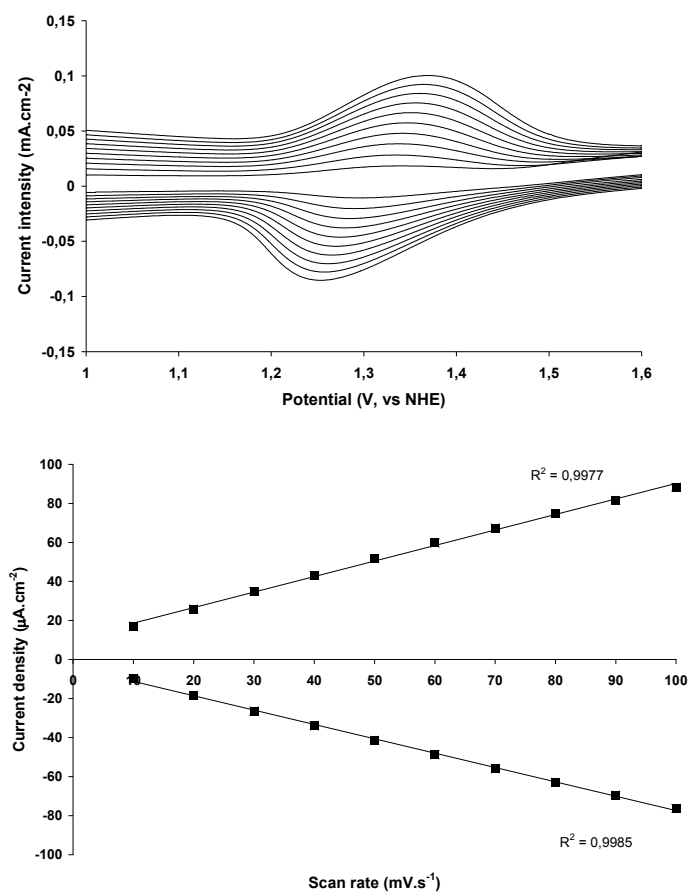

Figure S11. *Top* Cyclic voltammograms of complex **1** adsorbed on *dense nano-ITO* (10 layers prepared in the absence of template, treated at 450°C for 1 hour in air; electrode surface: 1 cm<sup>2</sup>), recorded in 0.1M aqueous HOTf at scan rates varying from 10 to 100 mV.s<sup>-1</sup>. *Bottom* Linear evolution with the scan rate of the cathodic and anodic peak currents related to the Ru<sup>III</sup>/Ru<sup>II</sup> couple.

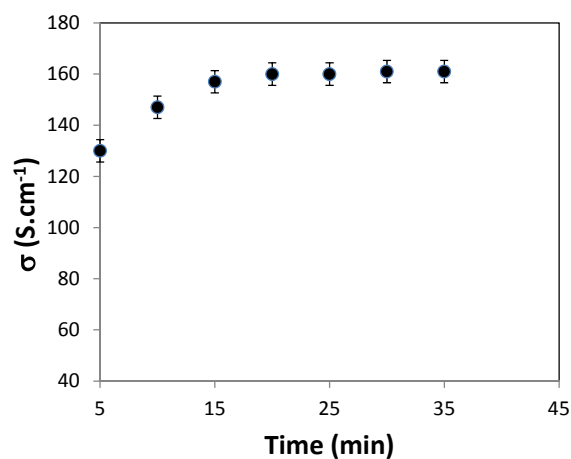

**Figure S12.** *In situ* electrical conductivity of films (thickness = 470 nm) heat-treated in air at 450°C: Evolution of the conductivity as a function of time for 10-layer templated nano-ITO films heated in 5% of  $\text{H}_2$  in Ar at 200°C.

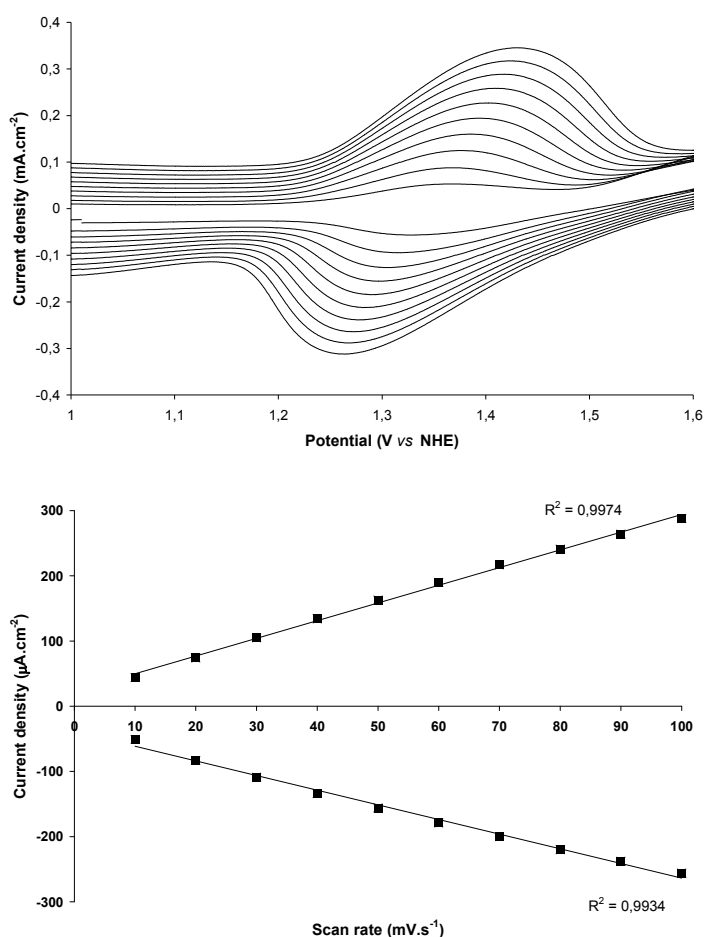

**Figure S13.** *Top* Cyclic voltammograms of complex 1 adsorbed on  $\text{H}_2$ -treated templated nano-ITO (10 layers, treated at 450°C for 1 hour in air then under 5%  $\text{H}_2$  in Ar at 200°C for 30 min; electrode surface:  $1\text{ cm}^2$ ), recorded in 0.1M aqueous HOTf at scan rates varying from 10 to 100  $\text{mV}\cdot\text{s}^{-1}$ . *Bottom* Linear evolution with the scan rate of the cathodic and anodic peak currents related to the  $\text{Ru}^{\text{III}}/\text{Ru}^{\text{II}}$  couple.

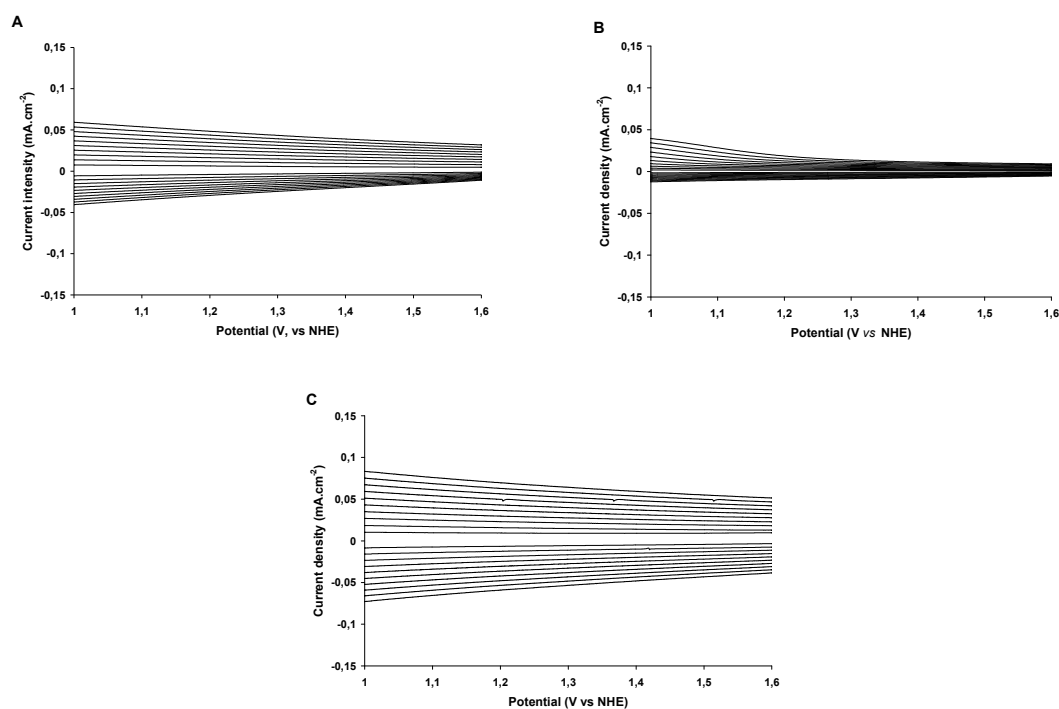

**Figure S14.** Sections of the cyclic voltammograms of non-functionalized **A)** 10-layer *templated nano-ITO*, **B)** 10-layer *dense nano-ITO*; **C)** 10 layers  $H_2$ -treated *templated nano-ITO*; recorded in 0.1M aqueous HOTf at scan rates varying from 10 to 100  $mV.s^{-1}$  (electrode surface: 1  $cm^2$ ).

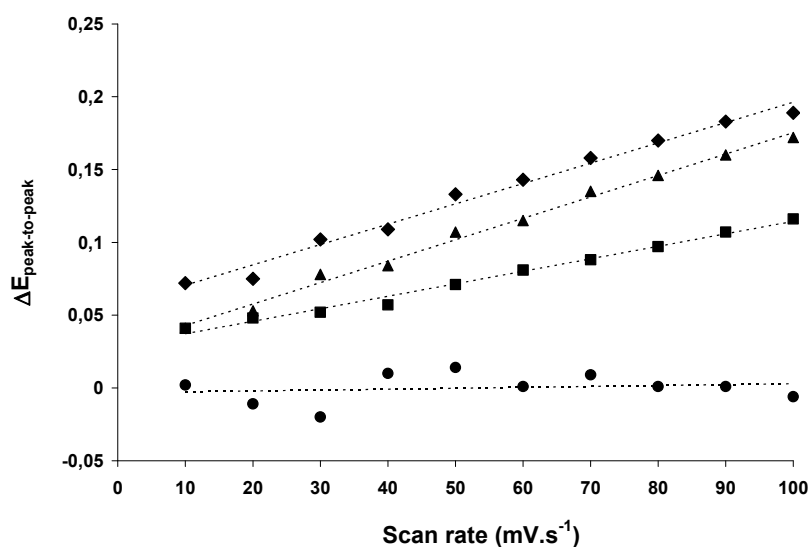

**Figure S15.** Peak-to-peak splitting between the oxidation and the reduction peak of complex **1** grafted on a 10-layer *templated nano-ITO* electrode ( $\blacklozenge$ ), a 10-layer  $H_2$ -treated *templated nano-ITO* electrode ( $\blacktriangle$ ), a 10-layer *dense nano-ITO* electrode ( $\blacksquare$ ) or a planar ITO electrode ( $\bullet$ ) (recorded in 0.1M aqueous HOTf at scan rates varying from 10 to 100  $mV.s^{-1}$ ).
